#### EDITORIAL NOTE

## Editorial Note: A prognostic index model for predicting long-term recurrence of uterine leiomyoma after myomectomy

The *PLOS One* Editors

The *PLOS One* Editors issue this Editorial Note because this article [1] was identified as one of a series of submissions for which we have concerns about aspects of the peer review process. Readers are advised to interpret the article [1] with caution.

The Editors have no evidence of any author involvement in the peer review concerns.

### Reference

1. Ming X, Zhou J, Gou J, Li N, Nie D, Xue L, et al. A prognostic index model for predicting long-term recurrence of uterine leiomyoma after myomectomy. *PLoS One*. 2021;16(7):e0254142. <https://doi.org/10.1371/journal.pone.0254142> PMID: [34197562](https://pubmed.ncbi.nlm.nih.gov/34197562/)

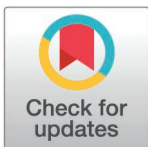

### OPEN ACCESS

**Citation:** The *PLOS One* Editors (2026) Editorial Note: A prognostic index model for predicting long-term recurrence of uterine leiomyoma after myomectomy. *PLoS One* 21(4): e0348026. <https://doi.org/10.1371/journal.pone.0348026>

**Published:** April 27, 2026

**Copyright:** © 2026 The *PLOS One* Editors. This is an open access article distributed under the terms of the [Creative Commons Attribution License](https://creativecommons.org/licenses/by/4.0/), which permits unrestricted use, distribution, and reproduction in any medium, provided the original author and source are credited.
